# Supplementary material
Source: MDPI journal article supplement (https://www.mdpi.com/2673-9976/11/1/1)
Supplement: s1 [file s1]

**Table S1.** Identified proteins in roots of *Musa acuminata* cv. Berangan

| Spot                                       | Identification                     | Taxonomy                     | Accession number | Database  | Mascot scores | Matched peptide | Protein sequence coverage (%) | Theoretical |     | Experimental |     |
|--------------------------------------------|------------------------------------|------------------------------|------------------|-----------|---------------|-----------------|-------------------------------|-------------|-----|--------------|-----|
|                                            |                                    |                              |                  |           |               |                 |                               | Mass (kDa)  | pI  | Mass (kDa)   | pI  |
| Carbohydrate and energy metabolism         |                                    |                              |                  |           |               |                 |                               |             |     |              |     |
| 180                                        | Malate dehydrogenase               | Nicotiana tabacum            | MDH_TOB AC       | SwissProt | 291           | 15              | 21                            | 36          | 5.9 | 43           | 6.8 |
| 47                                         | Glutathione S-transferase          | Silene vulgaris              | GSTF_SILV U      | SwissProt | 34            | 1               | 3                             | 25          | 5.9 | 27           | 6.1 |
| Defense and stress response                |                                    |                              |                  |           |               |                 |                               |             |     |              |     |
| 78                                         | Germin-like protein 5-1            | Oryza sativa subsp. japonica | GL52_ORY SJ      | SwissProt | 125           | 10              | 13                            | 23          | 8.4 | 32           | 8.5 |
| 171                                        | Isoflavone reductase homolog A622  | Nicotiana tabacum            | IFRH_TOB AC      | LudwigNR  | 44            | 1               | 3                             | 35          | 5.6 | 39           | 7.0 |
| Protein catabolism                         |                                    |                              |                  |           |               |                 |                               |             |     |              |     |
| 35                                         | Proteasome subunit beta type-6     | Nicotiana tabacum            | PSB6_TOB AC      | SwissProt | 54            | 1               | 6                             | 25          | 5.2 | 25           | 5.8 |
| 59                                         | Probable protein phosphatase 2C 57 | Oryza sativa subsp. japonica | P2C57_OR YSJ     | SwissProt | 32            | 1               | 2                             | 40          | 5.3 | 29           | 8.2 |
| Organelle                                  |                                    |                              |                  |           |               |                 |                               |             |     |              |     |
| 185                                        | Putative UPF0496 protein 5         | Oryza sativa subsp. indica   | U496E_OR YSI     | SwissProt | 43            | 1               | 1                             | 48          | 6.5 | 15           | 7.3 |
| 95                                         | Putative UPF0496 protein 5         | Oryza sativa subsp. indica   | U496E_OR YSI     | SwissProt | 33            | 2               | 1                             | 48          | 6.5 | 35           | 5.7 |
| Protein synthesis/ Here ambiguous function |                                    |                              |                  |           |               |                 |                               |             |     |              |     |
| 84                                         | Rubber elongation factor protein   | Hevea brasiliensis           | P15252           | SwissProt | 44            | 2               | 7                             | 15          | 5.0 | 32           | 7.4 |

**Table S1.** Continued

| Spot | Identification                   | Taxonomy                  | Accession number | Database  | Mascot scores | Matched peptide | Protein sequence coverage (%) | Theoretical |     | Experimental |     |
|------|----------------------------------|---------------------------|------------------|-----------|---------------|-----------------|-------------------------------|-------------|-----|--------------|-----|
|      |                                  |                           |                  |           |               |                 |                               | Mass (kDa)  | pI  | Mass (kDa)   | pI  |
| 5    | Rubber elongation factor protein | <i>Hevea brasiliensis</i> | P15252           | SwissProt | 35            | 2               | 15                            | 15          | 5.0 | 14           | 5.9 |
